# Supplementary material for: Decision-making ability, psychopathology, and brain connectivity
Source: PubMed Central journal article supplement (PMC8221811; doi:10.1016/j.neuron.2021.04.019), 2021-06-16
Supplement: mmc1.pdf [file mmc1.pdf]

**Neuron, Volume 109**

**Supplemental information**

**Decision-making ability,  
psychopathology, and brain connectivity**

**Michael Moutoussis, Benjamín Garzón, Sharon Neufeld, Dominik R. Bach, Francesco Rigoli, Ian Goodyer, Edward Bullmore, NSPN Consortium, Marc Guitart-Masip, and Raymond J. Dolan**

## A. Decision-making battery measures

|                            |                                                                        |
|----------------------------|------------------------------------------------------------------------|
| Learning rate (D)          | <b>Learning rate, Two -step task (transformed)</b>                     |
| Perseveration (D)          | <b>Perseveration parameter, Two-step task</b>                          |
| Inverse Temp. (A)          | <b>Inverse temperature, Go-NoGo task (transformed)</b>                 |
| Inverse Temp. (D)          | <b>Inverse temperature, Two -step task (transformed)</b>               |
| Initial Investment (F)     | <b>Initial investment in partner, Investor-Trustee task</b>            |
| Aversive lrn. Rate (A)     | <b>Aversive learning rate, Go-NoGo task</b>                            |
| Appet. lrn. rate (A)       | Appetitive learning rate, Go-NoGo task                                 |
| Appr.-Avoid fact.3 (C)     | 'Performance factor', Approach-Avoidance task                          |
| Cooperativeness (F)        | Degree of cooperative responding, Investor-Trustee task                |
| Appr.-Avoid fact.1 (C)     | 'Sensitivity to overall threat level', Approach-Avoidance task         |
| Appr.-Avoid fact.2 (C)     | 'Sensitivity to increasing hazard', Approach-Avoidance task            |
| Model-basedness (D)        | Model-basedness, Two-step task (transformed)                           |
| No ext. price cost (E)     | Subjective cost of samples, uncosted Info. Gathering (transf.)         |
| Eligibility (D)            | Eligibility trace parameter, Two -step task                            |
| Ext. priced cost (E)       | Subjective cost of samples, costed Info. Gathering (transf.)           |
| Action bias (A)            | Bias towards action, Go-NoGo task (transformed)                        |
| Skew preference (B)        | Sensitivity to outcome skewness, Econ. preference task                 |
| Epistemic trust (F)        | Epistemic trust parameter, delegated discounting (transf.)             |
| Gambling preference (B)    | Overall preference for gambling, Econ. preference task                 |
| Temp. Other-choice (F)     | Variability of choices-for-other, delegated discounting (transf.)      |
| Pavlovian RT diff. (A)     | React. time diff. between conditions, Go-NoGo task (transf.)           |
| Risk preference (B)        | Risk aversion, Econ. preference task                                   |
| Lapse rate (A)             | Lapse rate, Go-NoGo task (transformed)                                 |
| Reactiveness (F)           | Reactiveness to other's offers, Investor-Trustee task                  |
| Pavlovian bias (A)         | Pavlovian bias, Go-NoGo task (transformed)                             |
| Taste uncertainty (F)      | <b>Taste uncertainty, delegated discounting (transf.)</b>              |
| Temp.- ext. priced (E)     | <b>Decision temperature, costed Info. Gathering (transf.)</b>          |
| Lapse rate (F)             | <b>Lapse rate, delegated discounting (transformed)</b>                 |
| Temporal discounting (F)   | <b>Temporal discounting, delegated discounting (transf.)</b>           |
| Average RT (A)             | <b>mean log-Reaction Time, Go-NoGo task</b>                            |
| Temp. - no ext. price (E)  | <b>Decision temperature, uncosted Info. Gathering (transf.)</b>        |
| Exp. Value sensitivity (B) | <b>Sensitivity to expected value of outcome, Econ. preference task</b> |

**Table S1**, related to Figure 1. Key to the labels of cognitive measures, in the order of loading onto decision acuity. Green - load positively; Blue - load negatively; Bold - exceed 0.25 in loading. Letters in brackets refer to Table 1 in main text.

## B. Factor analysis and validation of Decision Acuity

### B1. Exploratory - Confirmatory analyses

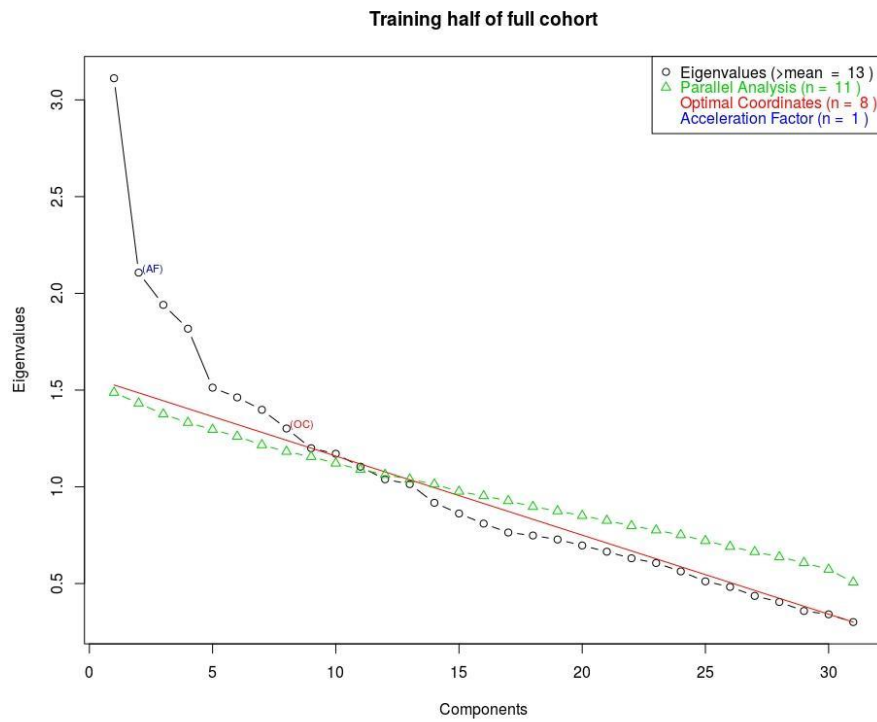

**Figure S1**, Related to STAR Methods. Parallel analysis to determine optimal number of factor-analytic components for the 'Discovery dataset', N = 416, and 32 variables.

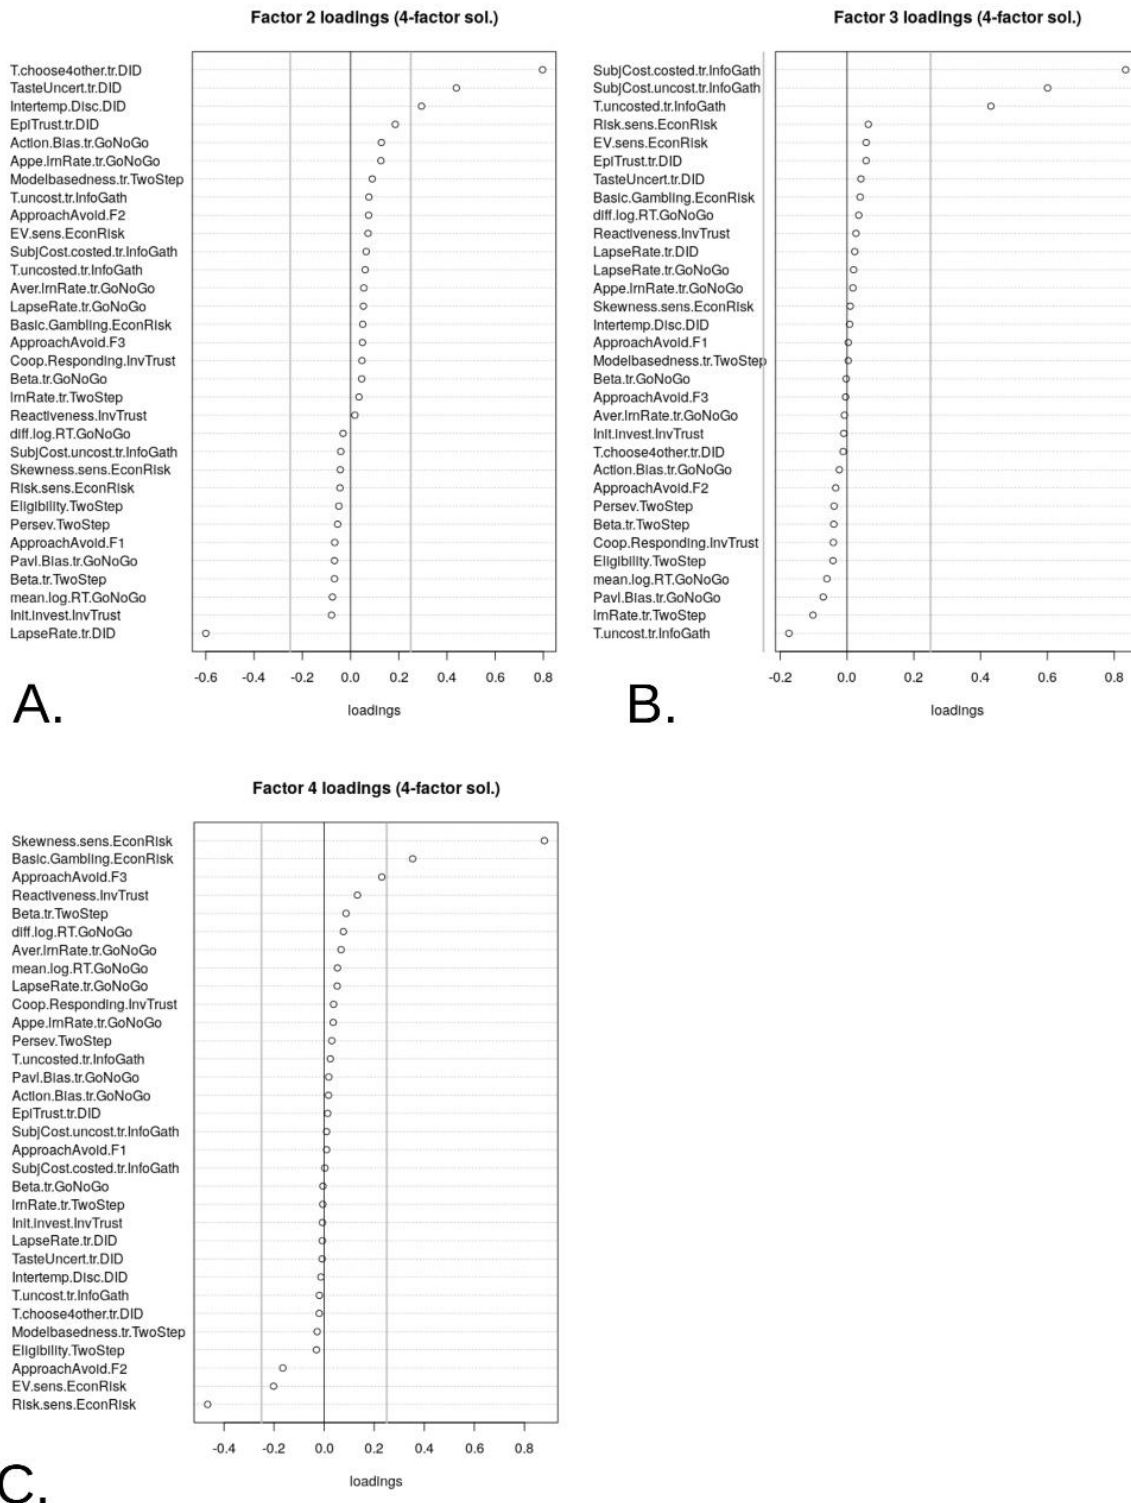

**Figure S2**, Related to STAR Methods. Factor loadings for factors 2 to 4, exploratory common factor analysis on the whole sample. loadings with absolute value over the noise floor or over 0.25 (gray lines) are exclusively from: **A.** Delegated Discounting task for Factor 2 **B.** Information Gathering task for Factor 3 and **C.** Economic risk preference task for Factor 4.

## B2. Stability Analysis

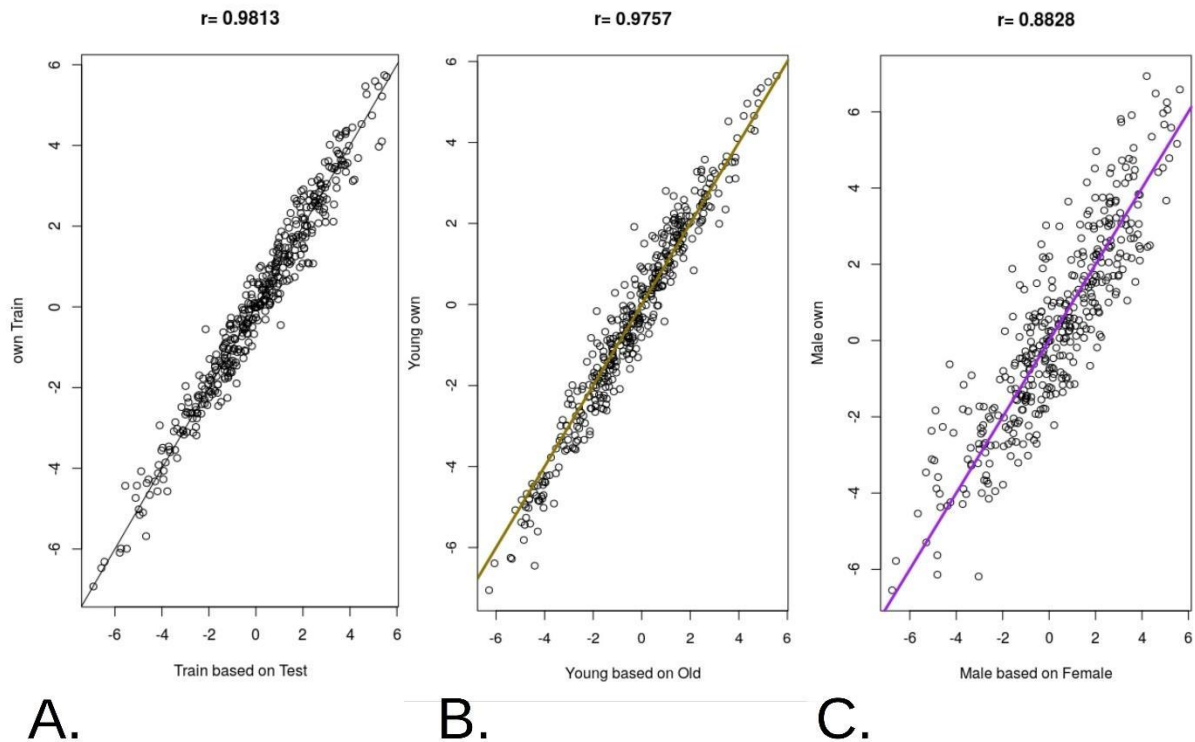

**Figure S3**, Related to STAR Methods. Stability of the construct of decision acuity with respect to random variation in the data, age or sex. In each case, component factor scores for half the sample based on ECFA of that same half-sample is predicted by component scores for the same individuals, but based on the construct (i.e., factor loadings) derived from the opposite half of the data. **A.** Exploratory-confirmatory split gives a very high correlation ( $r=0.98$ ,  $p \cong 0.0$ ) attesting to the reliability of the construct **B.** Median split at age= 18.54 years. Very high correlation ( $r=0.98$ ,  $p \cong 0.0$ ) attests to the stability of the construct in young adults vs. teenagers. **C.** Female-male split shows somewhat lower correlation ( $r=0.88$ ,  $p \cong 0.0$ ), suggesting that the same 'average' construct can be used in both sexes, but also that subtle sexual dimorphism exists.

## C. Additional associations of *d* with performance, symptoms and IQ

### C1. *d*, performance and IQ

|                  |         | <i>d</i>         | WASI IQ         |
|------------------|---------|------------------|-----------------|
| task performance | partial | r=0.42, p <1e-10 | r=0.05, p=0.14  |
|                  | raw     | r=0.50, p <1e-10 | r=0.30, p<1e-10 |
| <i>d</i>         | partial | -                | r=0.44, p<1e-10 |
|                  | raw     | -                | r=0.51, p<1e-10 |

**Table S2**, Related to Table 2. Relations of *d* and IQ with overall performance in four key tasks.

### C2. Relations of total IQ and decision acuity with symptom and disposition factors

| Psych. factor      | <i>r</i> psy-IQ | <i>p</i> psy-IQ | <i>r</i> psy-d  | <i>p</i> psy-d    |
|--------------------|-----------------|-----------------|-----------------|-------------------|
| <u>p-factor</u>    | -0.06566        | 0.06878         | -0.10516        | 0.00334           |
| self-confidence    | -0.05557        | 0.12362         | -0.08575        | 0.01681           |
| misbehaviour       | -0.08504        | 0.01835         | <b>-0.152</b>   | <b>2.0E-05</b>    |
| worry              | 0.07159         | 0.04718         | <b>0.13439</b>  | <b>0.00017</b>    |
| aberrant thinking  | <b>-0.15563</b> | <b>1E-05</b>    | <b>-0.16718</b> | <b>&lt; 1E-05</b> |
| mood               | -0.01269        | 0.72524         | 0.01864         | 0.60389           |
| <u>Sociality</u>   | -0.07832        | 0.02599         | <b>-0.13253</b> | <b>0.00014</b>    |
| social sensitivity | 0.06021         | 0.08721         | 0.01161         | 0.74023           |
| sensation seeking  | 0.03853         | 0.27396         | 0.01699         | 0.62744           |
| effortful control  | 0.08922         | 0.01117         | 0.05352         | 0.12611           |
| suspiciousness     | -0.10465        | 0.0029          | 0.01312         | 0.70782           |

**Table S3**, Related to Table 2. Raw correlations of total IQ and decision acuity with symptom and disposition factors at baseline. The Bonferroni-corrected for 22 comparisons correlations at  $p < 0.05$  are shown in bold. IQ mostly correlates with 'aberrant thinking' symptoms (schizotypal / obsessional) while decision acuity additionally relates to 'misbehaviour', 'worry' and most importantly the dispositional general factor 'Sociality'.

## D. Brain connectivity analyses

### D1. Reliability of functional connectivity

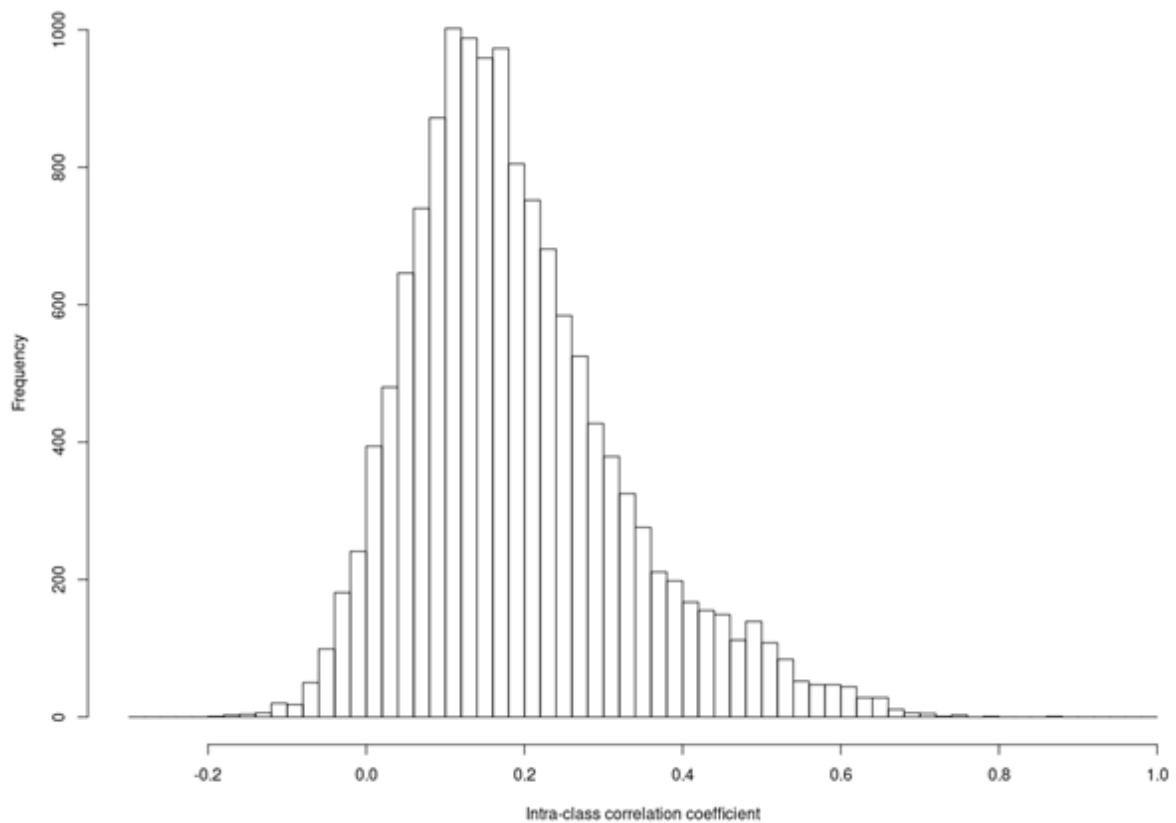

**Figure S4**, Connected to STAR Methods and Figures 3-5. Histogram of intraclass correlation coefficients across functional connections. For each connection, the intraclass correlation coefficient (ICC) with a two-way mixed-effects model (ICC3) was computed. Estimates ranged between -0.19 and 0.87 with a mean value of 0.19 and a positively skewed distribution.

## **E - The Neuroscience in Psychiatry Consortium**

### **Principal investigators:**

Edward Bullmore (CI from 01/01/2017)  
Raymond Dolan  
Ian Goodyer (CI until 01/01/2017)  
Peter Fonagy  
Peter Jones

### **NSPN funded staff:**

Michael Moutoussis  
Tobias Hauser  
Sharon Neufeld  
Rafael Romero-Garcia  
Michelle St Clair  
Petra Vértes  
Kirstie Whitaker  
Becky Inkster  
Gita Prabhu  
Cinly Ooi  
Umar Toseeb  
Barry Widmer  
Junaid Bhatti  
Laura Villis  
Ayesha Alrumaithi  
Sarah Birt  
Aislinn Bowler  
Kalia Cleridou  
Hina Dadabhoy  
Emma Davies  
Ashlyn Firkins  
Sian Granville  
Elizabeth Harding  
Alexandra Hopkins  
Daniel Isaacs  
Janchai King  
Danae Kokorikou  
Christina Maurice  
Cleo McIntosh  
Jessica Memarzia  
Harriet Mills  
Ciara O'Donnell  
Sara Pantaleone  
Jenny Scott

### **Affiliated scientists:**

Pasco Fearon  
John Suckling



Anne-Laura van Harmelen  
Rogier Kievit
